# Supplementary material for: Common variants upstream of MLF1 at 3q25 and within CPZ at 4p16 associated with neuroblastoma
Source: PLOS journal article supplement (doi:10.1371/journal.pgen.1006787), 2017-05-18
Supplement: S18 (10.1371/journal.pgen.1006787.s018) [file journal.pgen.1006787.s018]

**Discovery Cohort**  
2,101 cases; 4,202 controls  
European Ancestry  
( 7,968,453 variants tested)

Novel Locus  
 $p < 5.0 \times 10^{-7}$   
?

selection of 1-2 variants per novel locus  
for replication

**Replication #1**

365 cases; 2,491 controls  
African American  
(1 variant tested)

**Replication #2**

371 cases; 1,122 controls  
United Kingdom  
(3 variants tested)

**Replication #3**

427 cases; 783 controls  
Italy  
(3 variants tested)
